# Supplementary material for: Direct Lagrangian tracking simulation of droplet growth in vertically developing cloud
Source: Copernicus journal article supplement (doi:10.5194/acp-18-16619-2018), 2018-11-23
Supplement: Supplementary file 1 [file acp-18-16619-2018-supplement.zip]

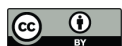

## *Supplement of*

# **Direct Lagrangian tracking simulation of droplet growth in vertically developing cloud**

**Yuichi Kunishima and Ryo Onishi**

*Correspondence to:* Ryo Onishi ([onishi.ryo@jamstec.go.jp](mailto:onishi.ryo@jamstec.go.jp))

- [acp-18-16619-2018-supplement-title-page.pdf](#)
- [Movie\\_S1.mp4](#)

The copyright of individual parts of the supplement might differ from the CC BY 4.0 License.
